# Supplementary material for: Dynamic covalent polymer engineering for stable and self-healing perovskite solar cells
Source: Royal Society of Chemistry journal article supplement (doi:10.1039/d3mh01293j), 2023-01-01
Supplement: d3mh01293j1.pdf [file d3mh01293j1.pdf]

## Dynamic Covalent Polymer Engineering for Stable And Self-Healing Perovskite Solar Cells

Peng Xu,<sup>ab #</sup> Jian Liu,<sup>a #</sup> Shuai Wang,<sup>b</sup> Jiujiang Chen,<sup>a</sup> Bin Han,<sup>a</sup> Yuanyuan Meng,<sup>a</sup>  
Shuncheng Yang,<sup>a</sup> Lisha Xie,<sup>ac</sup> Mengjin Yang<sup>\*ac</sup>, Runping Jia<sup>\*b</sup>, and Ziyi Ge<sup>\*ac</sup>

<sup>a</sup> Zhejiang Provincial Engineering Research Center of Energy Optoelectronic Materials and  
Devices, Ningbo Institute of Materials Technology and Engineering, Chinese Academy of  
Sciences, Ningbo 315201, P. R. China.

<sup>b</sup> School of Materials Science and Engineering, Shanghai Institute of Technology, Shanghai  
201418, P.R. China.

<sup>c</sup> Center of Materials Science and Optoelectronics Engineering, University of Chinese Academy  
of Sciences, Beijing, 100049, P. R. China.

# equal contribution

E-mail: [yangmengjin@nimte.ac.cn](mailto:yangmengjin@nimte.ac.cn), [jiarp@sit.edu.cn](mailto:jiarp@sit.edu.cn) and [geziyi@nimte.ac.cn](mailto:geziyi@nimte.ac.cn)

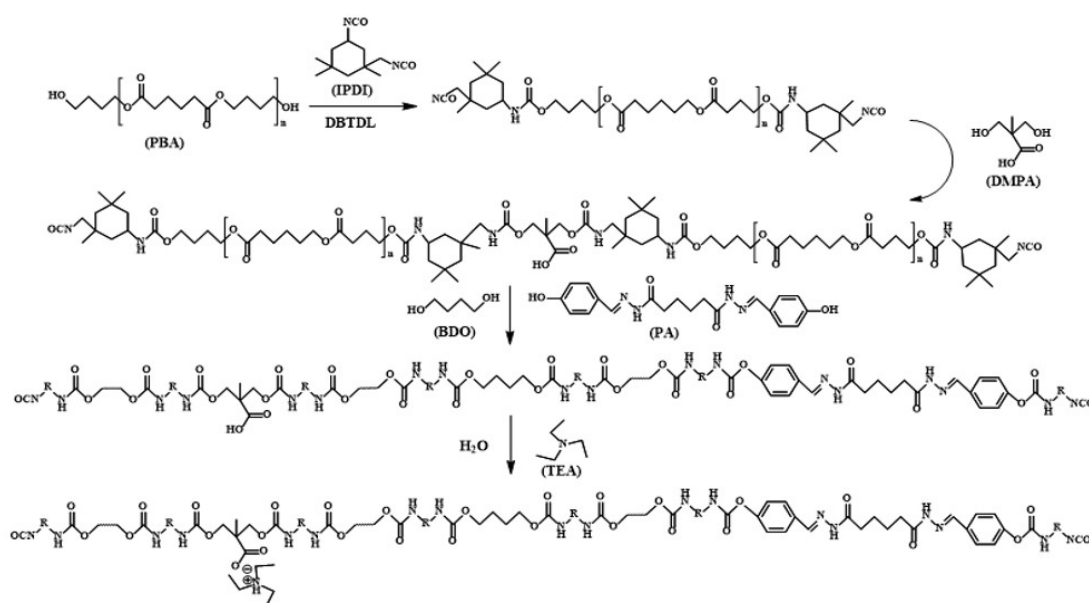

Figure S1 Synthesis steps of Ab-WPU

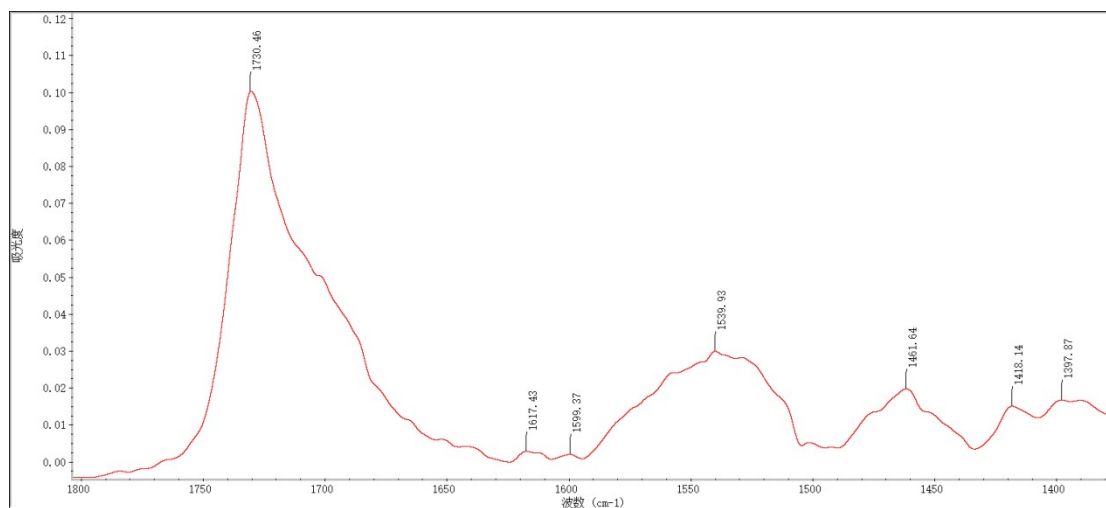

Figure S2 Ab-WPU infrared absorption (FTIR) spectroscopy

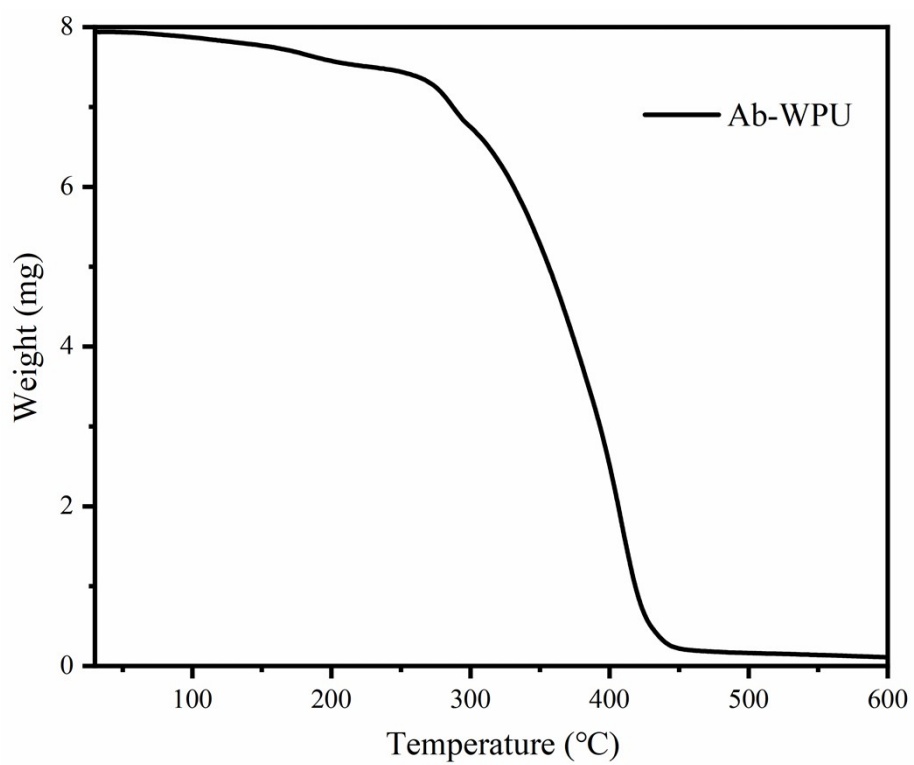

Figure S3 Thermogravimetric analysis (TGA) diagram of Ab-WPU

**60°C+PbI<sub>2</sub>@ ethanol solution**

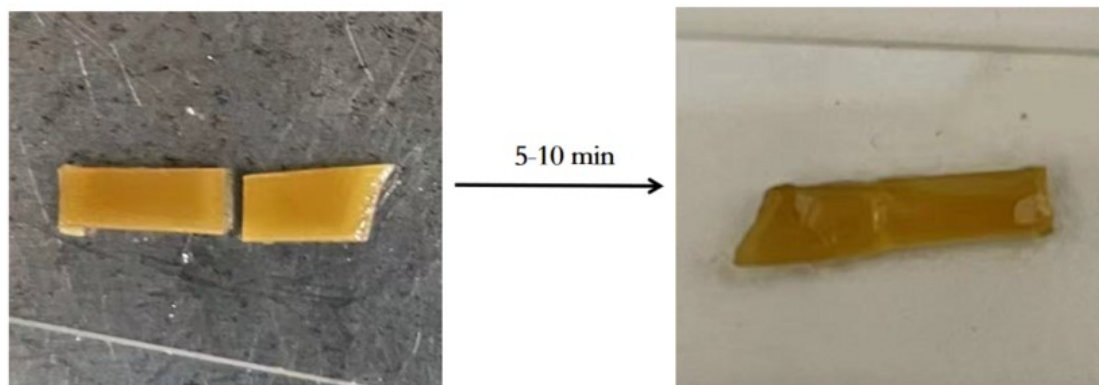

Figure S4 Ab-WPU self-healing diagram under heating and PbI<sub>2</sub> conditions

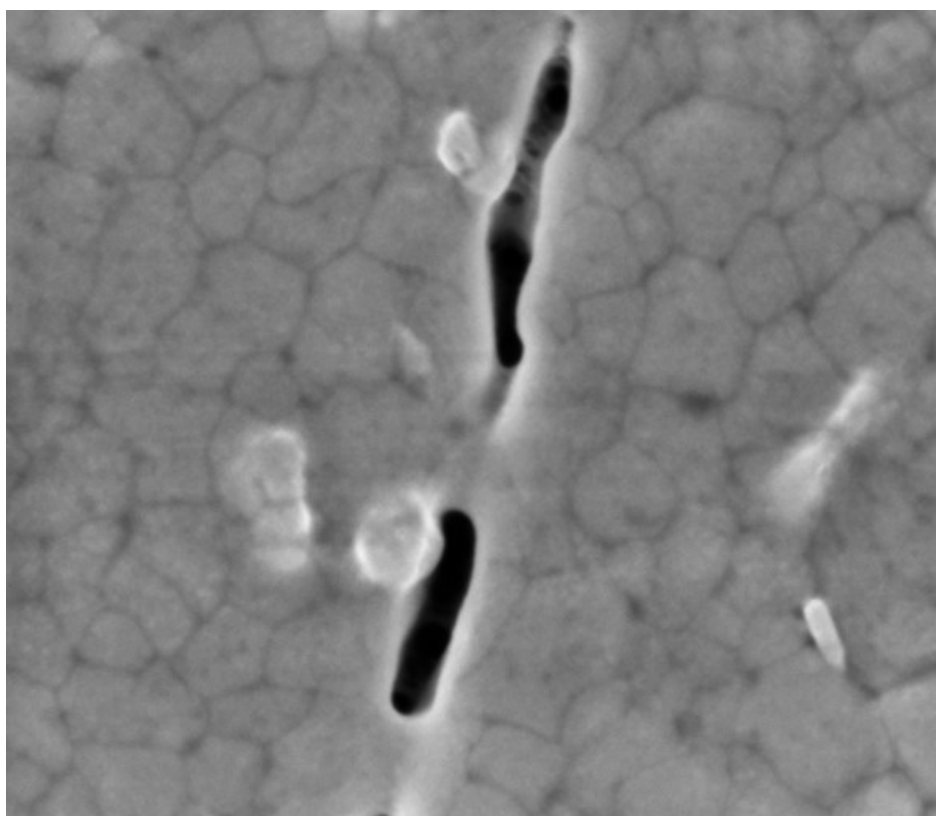

Figure S5 Crack morphology of perovskite film

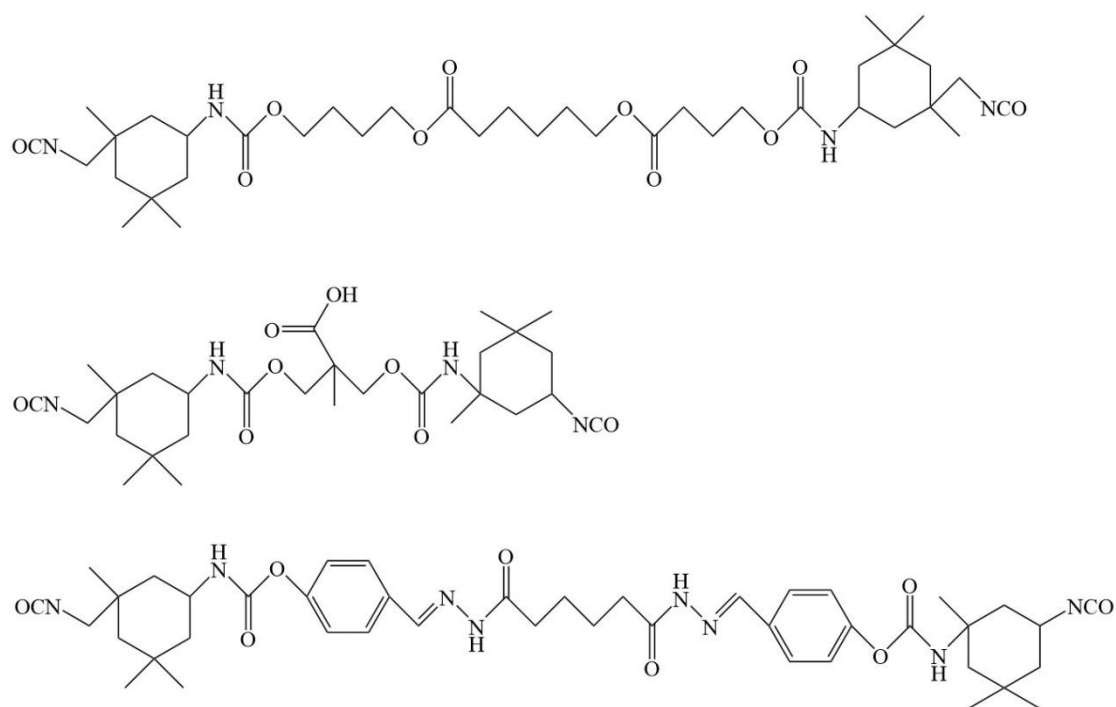

Figure S6 Three structural units split into Ab-WPU

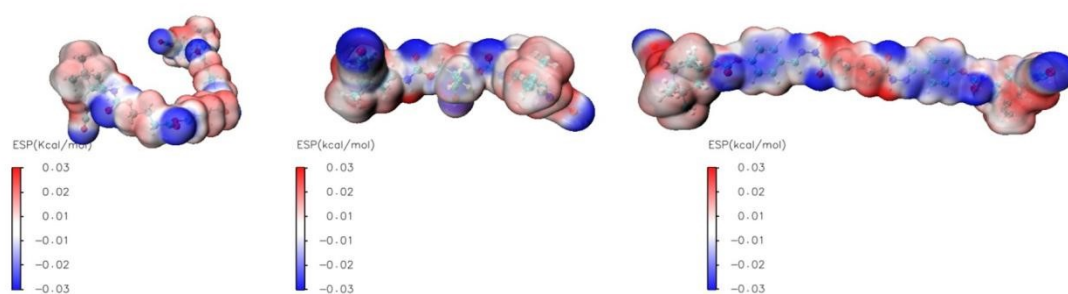

Figure S7 Charge distribution calculated by DFT for the three structural units split into Ab-WPU

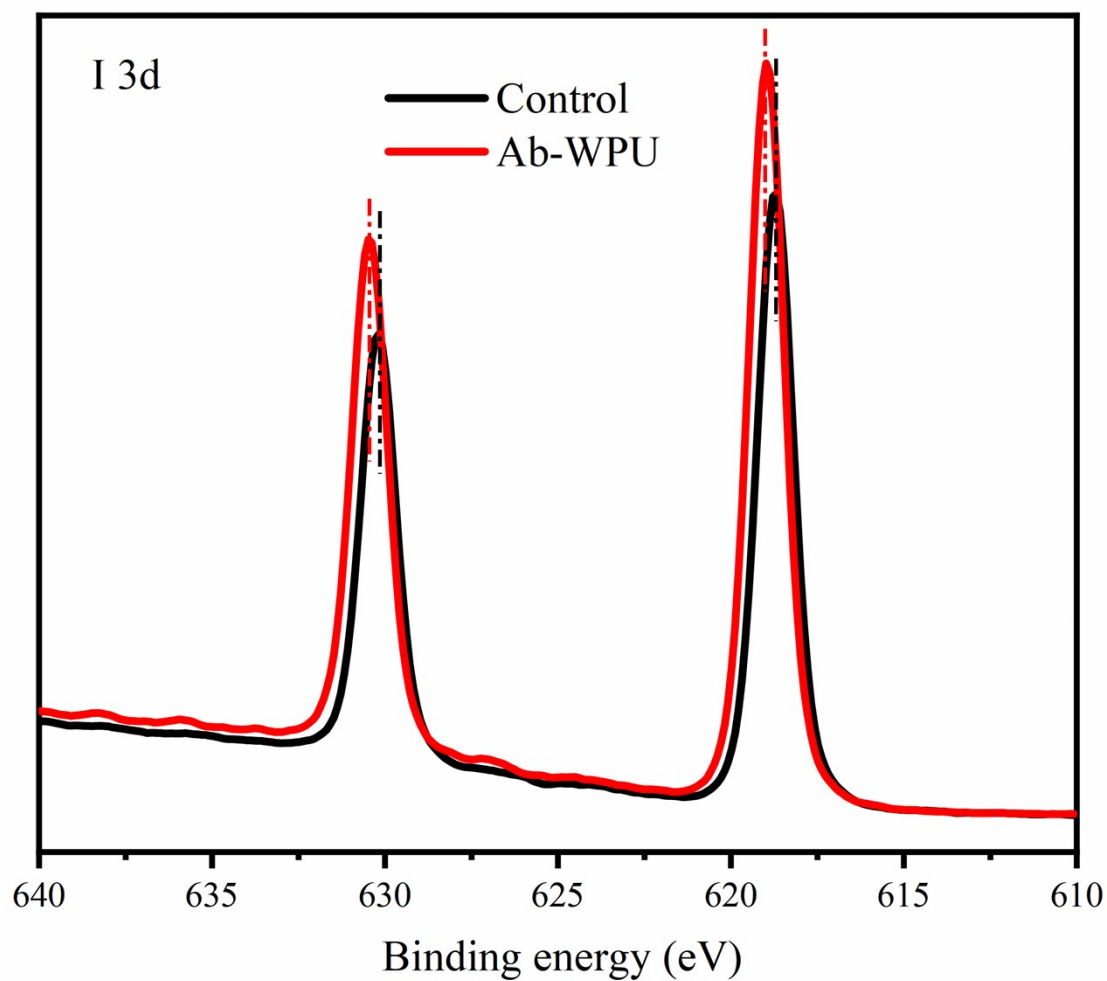

Figure S8 XPS comparison of perovskite layer without Ab-WPU modification and with Ab-WPU modification

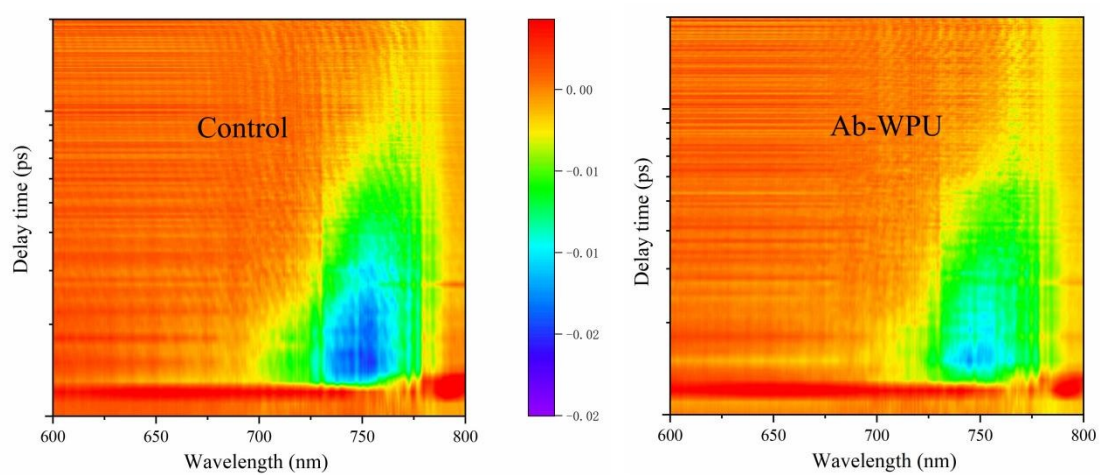

Figure S9 TA testing of perovskite films without and after Ab-WPU modification

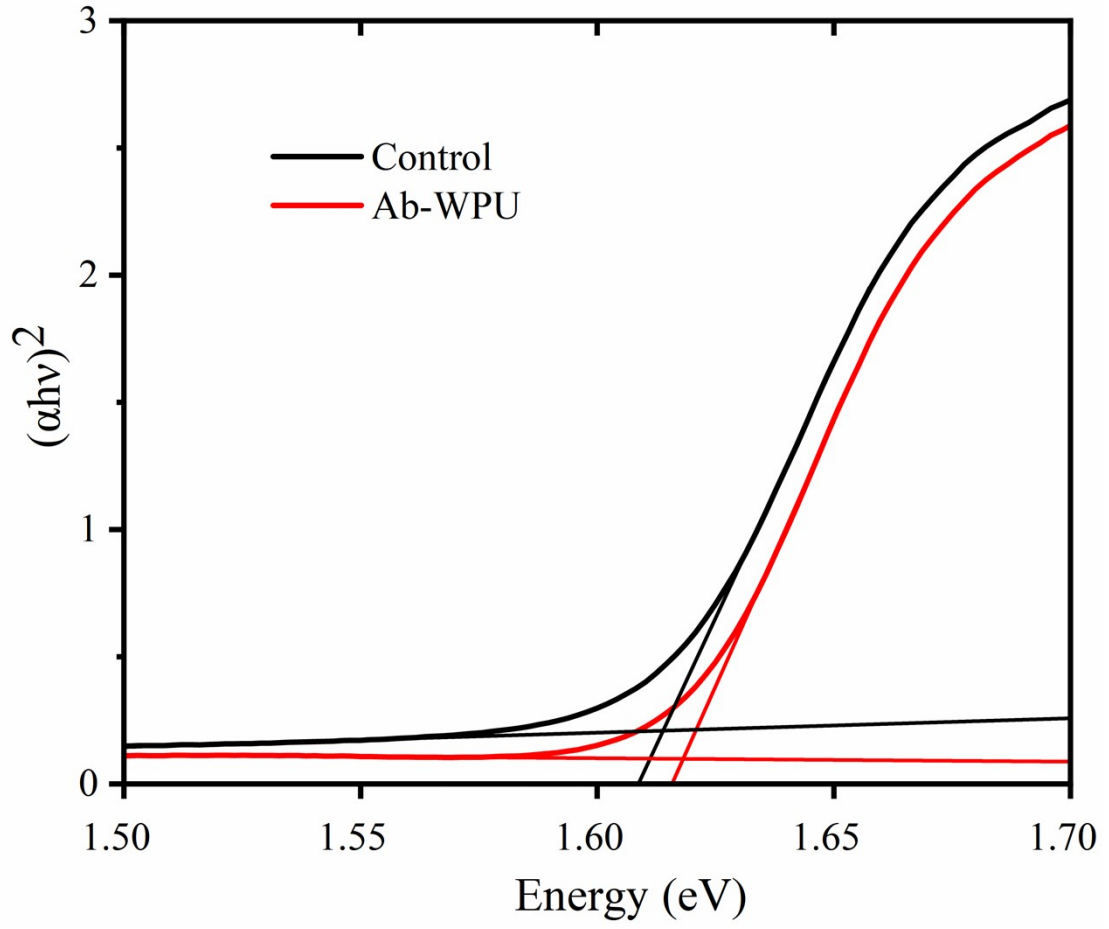

Figure S10 Tauc diagram of the perovskite film modified with Ab-WPU compared to the device

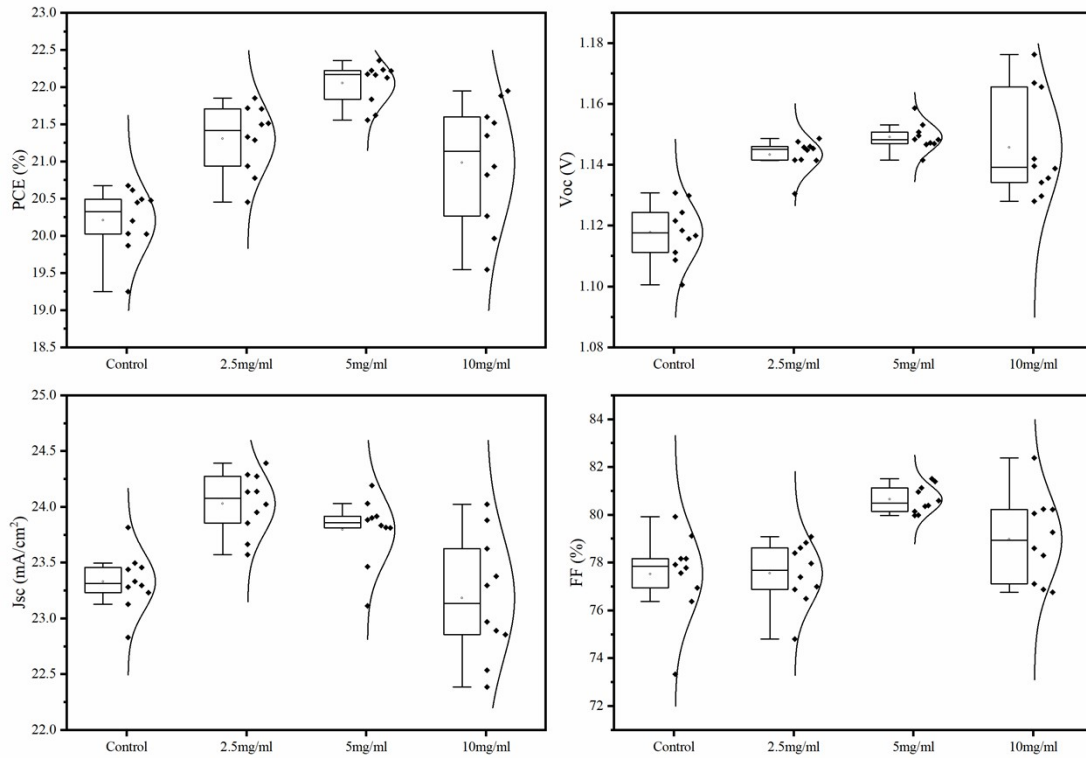

Figure S11 Performance statistics of 10 different batches of solar cells prepared before and after treating PSCs with different concentrations of Ab-WPU.

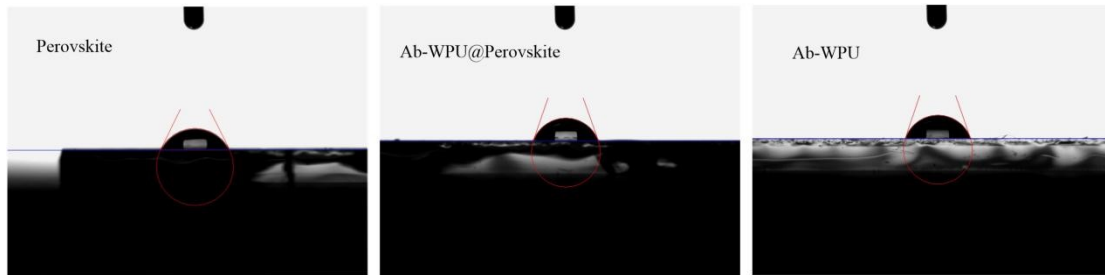

Figure S12 Comparison device, water contact angle of Ab WPU modified device and Ab-WPU

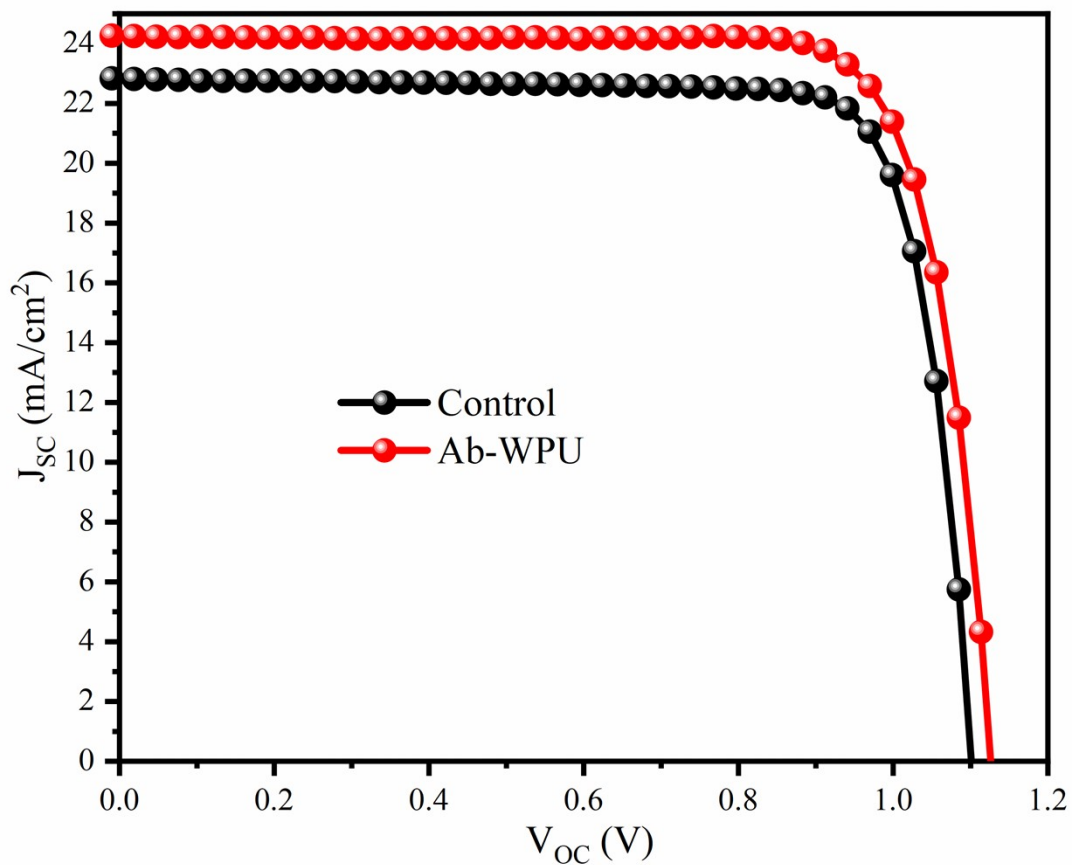

Figure S13 J-V curve of reference device and Ab-WPU modified device used for testing thermal stability

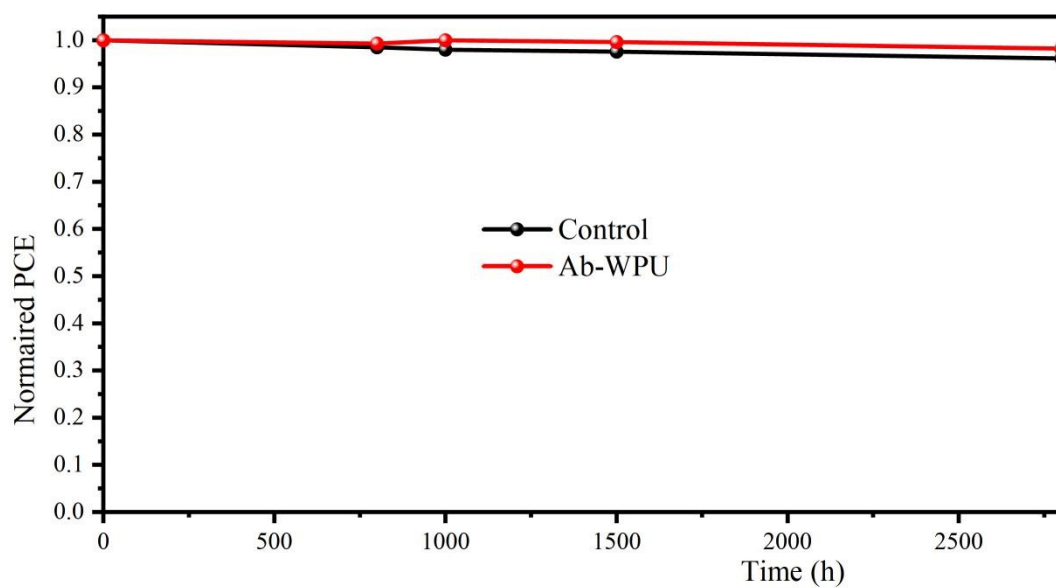

Figure S14 Normalized PCE plots of the stability of PSCs devices without additives and modified with Ab-WPU in an N<sub>2</sub> filled environment



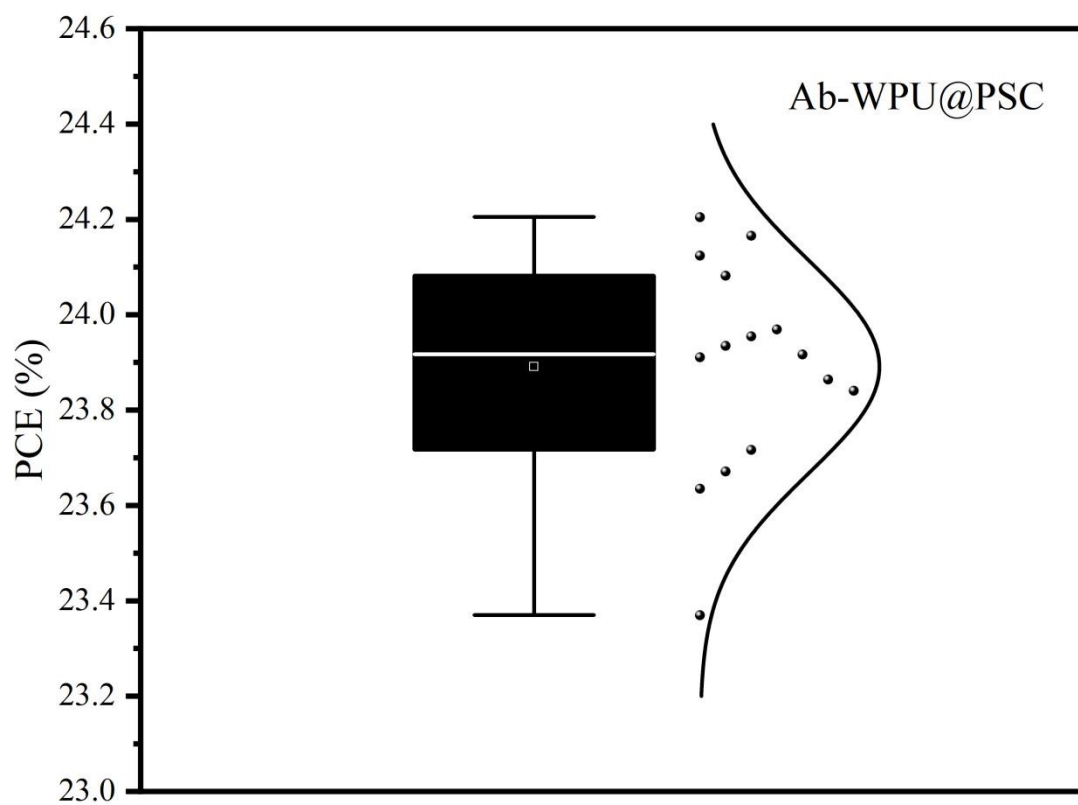

Figure S15 PCE statistics of 15 different devices of  $\text{FA}_{0.96}\text{Cs}_{0.04}\text{PbI}_{2.8}\text{Br}_{0.12}$  solar cells with Ab-WPU

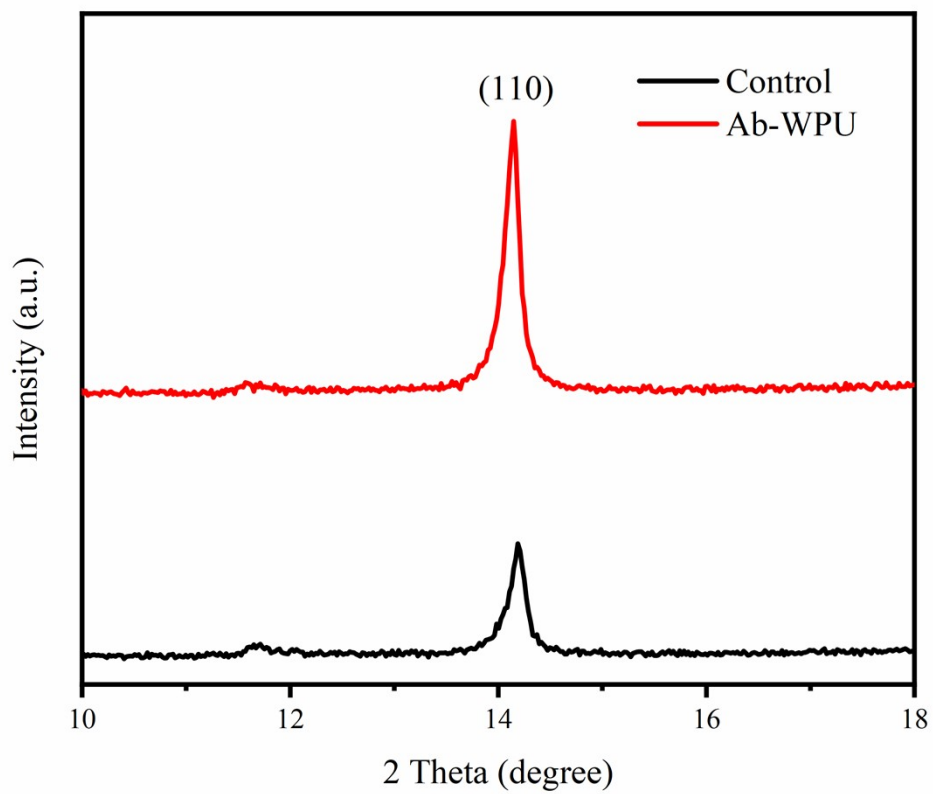

Figure S16 The XRD images of the perovskite layer without Ab-WPU modification and with Ab WPU modification

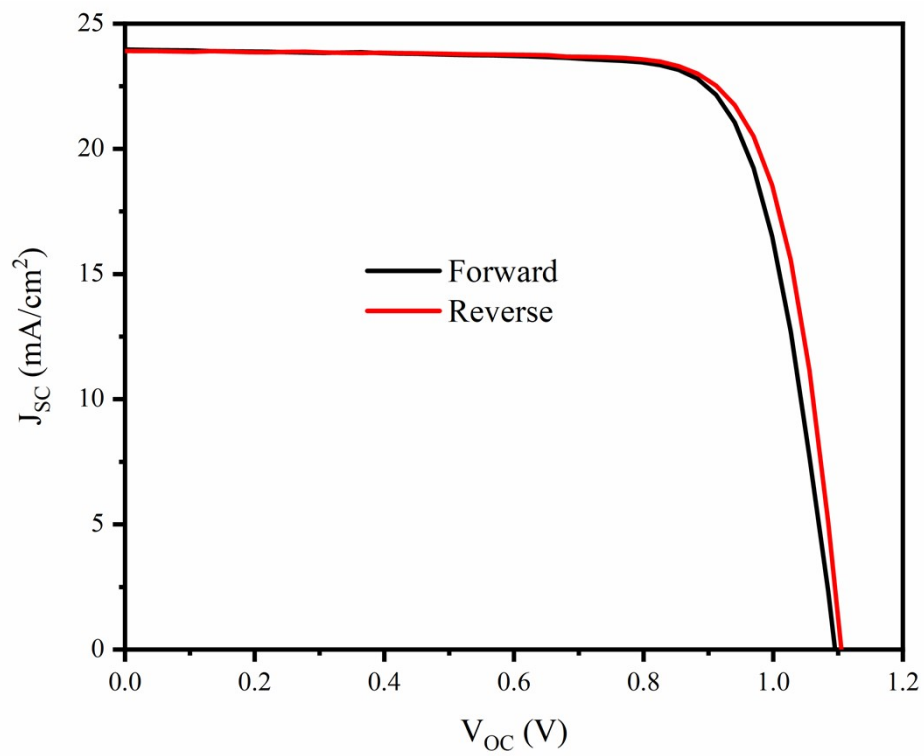

Figure S17 Forward and Reverse sweeps for Control devices

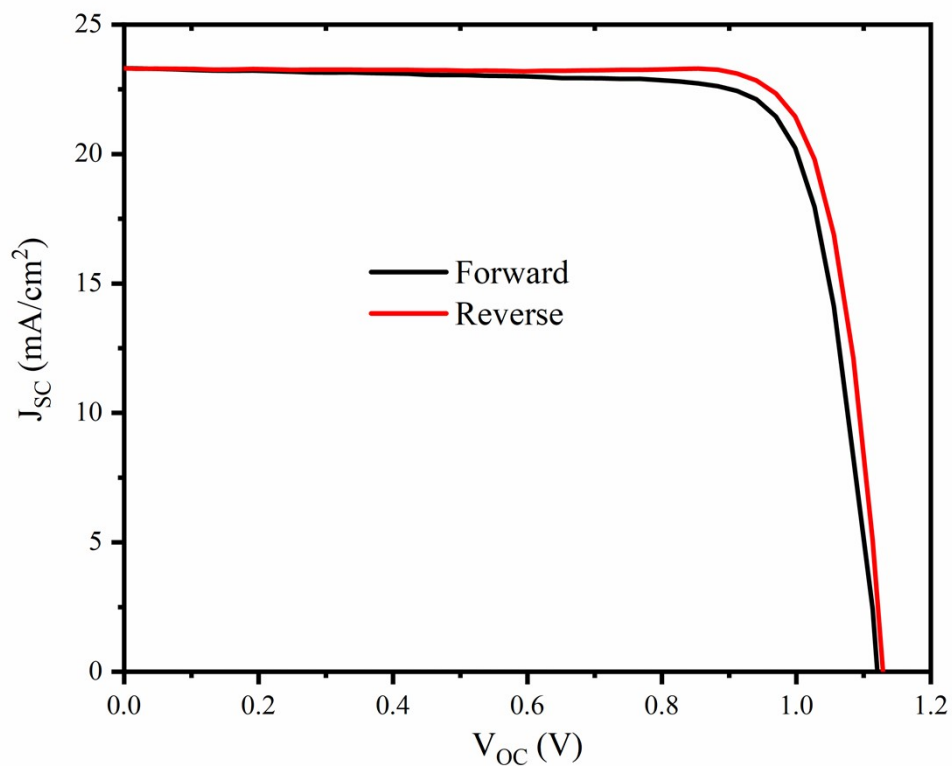

Figure S18 Forward and Reverse sweeps for Ab-WPU devices

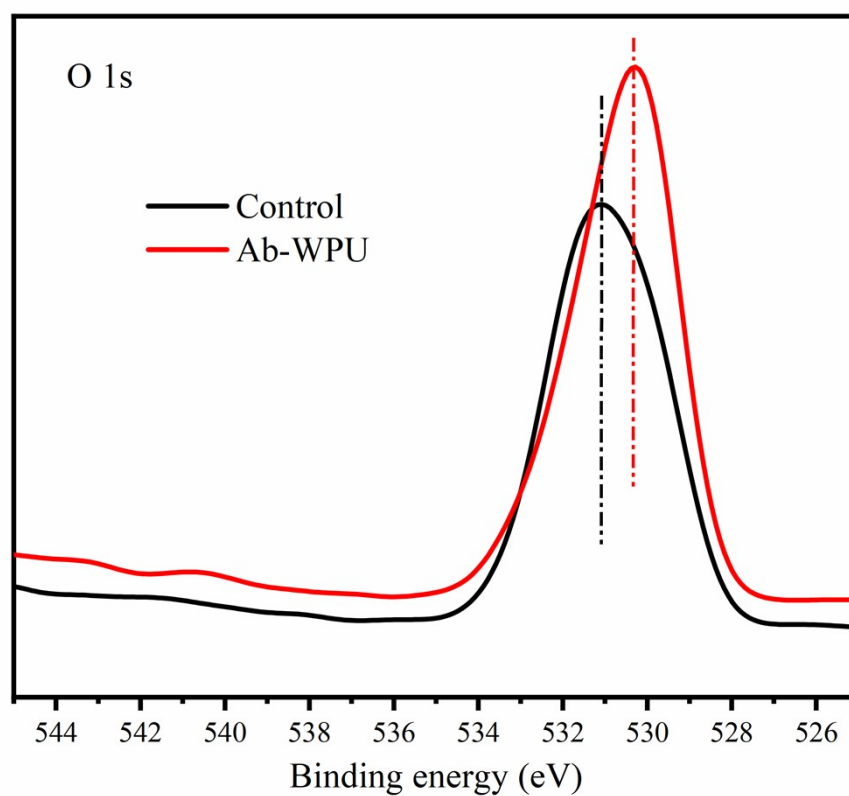

Figure S19 XPS comparison of perovskite layer without Ab-WPU modification and with Ab-WPU modification

Table S1 Photovoltaic performance parameters of the best devices of  $\text{FA}_{0.87}\text{Cs}_{0.13}\text{PbI}_{2.7}\text{Br}_{0.3}$  perovskite solar cells without additives and modified by Ab-WPU

| Samples        | Voc (V) | Jsc (mA/cm <sup>2</sup> ) | FF (%) | PCE (%) |
|----------------|---------|---------------------------|--------|---------|
| Control        | 1.13    | 23.22                     | 78.06  | 20.49   |
| 5 mg/ml Ab-WPU | 1.152   | 23.88                     | 81.5   | 22.43   |

Table S2 Literature related to polyurethane modified perovskite layer

| Structure                                                           | Journal                       | Date          | PCE (%)            | V <sub>oc</sub> (V) | J <sub>sc</sub> (mA/cm <sup>2</sup> ) |
|---------------------------------------------------------------------|-------------------------------|---------------|--------------------|---------------------|---------------------------------------|
| FTO/SnO <sub>2</sub> /PU-FAPbI <sub>3</sub> /Spiro-OMeTAD/Ag        | Carbon                        | April 2022    | 21.36 <sup>1</sup> | 1.15                | 22.44                                 |
| FTO/c-TiO/PU-CsPbIBr <sub>2</sub> /Carbon                           | Angew. Chem. Int. Ed.         | December 2021 | 10.61 <sup>2</sup> | 1.293               | 11.58                                 |
| ITO/NiO <sub>x</sub> /Perovskite/PC <sub>61</sub> BM/PEI/Ag         | Nano Energy                   | June 2022     | 20.30 <sup>3</sup> | 1.14                | 22.88                                 |
| ITO/SnO <sub>2</sub> /SMPU-FAMAPbIBr <sub>3</sub> /Spiro-OMeTAD/Au  | InfoMat                       | August 2022   | 21.33 <sup>4</sup> | 1.18                | 24.21                                 |
| (HPMC)/hc-PEDOT:PSS/SnO <sub>2</sub> /PU-perovskite/Spiro-OMeTAD/Ag | Advanced Functional Materials | March 2023    | 20.04 <sup>5</sup> | 1.15                | 23.16                                 |

Table S3 Photovoltaic parameters of flexible comparison devices and Ab-WPU modified devices

| Samples        | Voc (V) | Jsc (mA/cm <sup>2</sup> ) | FF (%) | PCE (%) |
|----------------|---------|---------------------------|--------|---------|
| Control        | 1.13    | 23.22                     | 78.06  | 20.49   |
| 5 mg/ml Ab-WPU | 1.152   | 23.88                     | 81.5   | 22.43   |

Table S4 Photovoltaic parameters of the reference device and Ab-WPU modified device used for testing thermal stability

| Samples        | Voc (V) | Jsc (mA/cm <sup>2</sup> ) | FF (%) | PCE (%) |
|----------------|---------|---------------------------|--------|---------|
| Control        | 1.099   | 22.80                     | 81.61  | 20.45   |
| 5 mg/ml Ab-WPU | 1.124   | 24.26                     | 80.24  | 21.88   |

Table S5 Rigid and flexible device efficiency comparisons

| Journal                                    | Date          | Rigid PCE (%) | Flexible PCE (%) |
|--------------------------------------------|---------------|---------------|------------------|
| Advanced Functional Materials <sup>6</sup> | April 2022    | 24.40         | 22.04            |
| Joule <sup>7</sup>                         | March 2023    | 24.9          | 22.3             |
| Nano Energy <sup>3</sup>                   | June 2022     | 20.30         | 17.19            |
| InfoMat <sup>4</sup>                       | August 2022   |               | 21.33            |
| Advanced Functional Materials <sup>8</sup> | March 2023    | 22.43         | 19.03            |
| Joule <sup>9</sup>                         | February 2023 |               | 23.4             |
| Nano Energy <sup>10</sup>                  | February 2023 | 22.62         | 19.34            |
| InfoMat <sup>11</sup>                      | August 2023   | 24.56         | 22.65            |
| Nature Communications <sup>12</sup>        | March 2023    | 23.26         | 22.10            |

## References

- 1 T. Zheng, Q. Zhou, T. Yang, Y. Zhao, B. Fan, J. Bo, L. Fan and R. Peng, *Carbon*, 2022, **196**, 213–219.
- 2 Q. Zhang, J. Duan, Q. Guo, J. Zhang, D. Zheng, F. Yi, X. Yang, Y. Duan and Q. Tang, *Angewandte Chemie International Edition*, 2022, **61**, e202116632.
- 3 Y. Lan, Y. Wang, Y. Lai, Z. Cai, M. Tao, Y. Wang, M. Li, X. Dong and Y. Song, *Nano Energy*, 2022, **100**, 107523.
- 4 T. Xue, Z. Huang, P. Zhang, M. Su, X. Hu, T. Wu, B. Fan, G. Chen, G. Yu and W. Liu, *InfoMat*, 2022, **4**, e12358.
- 5 C. Gong, F. Li, X. Hu, C. Wang, S. Shi, T. Hu, N. Zhang, C. Liang, D. Wu and Y. Chen, *Advanced Functional Materials*, 2023, 2301043.
- 6 C. Liu, K. Huang, B. Hu, Y. Li, L. Zhang, X. Zhou, Y. Liu, Z. Liu, Y. Sheng and S. Chen, *Advanced Functional Materials*, 2023, 2212698.
- 7 T. Yang, C. Ma, W. Cai, S. Wang, Y. Wu, J. Feng, N. Wu, H. Li, W. Huang and Z. Ding, *Joule*, 2023, **7**, 574–586.
- 8 J. Yang, W. Sheng, X. Li, Y. Zhong, Y. Su, L. Tan and Y. Chen, *Advanced Functional Materials*, 2023, 2214984.
- 9 Y. Wu, G. Xu, J. Xi, Y. Shen, X. Wu, X. Tang, J. Ding, H. Yang, Q. Cheng and Z. Chen, *Joule*, 2023, **7**, 398–415.
- 10 Z. Yi, B. Xiao, X. Li, Y. Luo, Q. Jiang and J. Yang, *Nano Energy*, 2023, **109**, 108241.
- 11 Y. Cao, J. Feng, Z. Xu, L. Zhang, J. Lou, Y. Liu, X. Ren, D. Yang and S. Liu, *InfoMat*, 2023, e12423.
- 12 Z. Huang, L. Li, T. Wu, T. Xue, W. Sun, Q. Pan, H. Wang, H. Xie, J. Chi and T. Han, *Nature Communications*, 2023, **14**, 1204.
